# Supplementary material for: Deregulation of Autophagy and Apoptosis in Patients with Myelodysplastic Syndromes: Implications for Disease Development and Progression
Source: MDPI journal article supplement (doi:10.3390/cimb45050263), 2023-05-08
Supplement: s1 [file s1]

## Supplementary material

### Materials and Methods

#### *Real-time PCR-based array analysis*

Regarding the processing of RNA samples, cDNA was mixed with the RT<sup>2</sup> SYBR Green Mastermix and RNase-free water according to the protocol. The qRT-PCR was performed on a BioRad CFX96 according to the RT<sup>2</sup> Profiler PCR Array instructions. The data were analyzed using the PCR Array Data Analysis QIAGEN web portal at GeneGlobe. Microarray expression data was obtained for each individual gene and was normalized against the housekeeping gene *HPRT1* by calculating the  $\Delta C_t$ . Fold changes in gene expression were generated using the  $2^{-\Delta\Delta C_t}$  method, with the cut-offs for significant upregulation and downregulation being set to  $>2$  and  $<-2$ , respectively.

### Supplementary Tables

**Supplementary Table S1.** Clinical and biological characteristics for each individual patient of the study cohort according to the IPSS-R scoring system.

| IPSS-R category | Gender | Age at diagnosis |
|-----------------|--------|------------------|
| Very low        | M      | 59               |
| Very low        | F      | 70               |
| Low             | M      | 72               |
| Low             | M      | 73               |
| Low             | M      | 76               |
| Low             | M      | 82               |

|      |   |    |
|------|---|----|
| Low  | M | 83 |
| Low  | M | 82 |
| Low  | M | 80 |
| Low  | M | 73 |
| Low  | F | 65 |
| Low  | M | 64 |
| Low  | F | 78 |
| High | M | 88 |
| High | M | 83 |
| High | F | 89 |
| High | F | 70 |
| High | M | 90 |
| High | M | 86 |
| High | M | 66 |
| High | M | 64 |
| High | F | 70 |
| High | M | 60 |
| High | M | 80 |
| High | M | 76 |
| High | M | 82 |
| High | F | 78 |

|           |   |    |
|-----------|---|----|
| High      | F | 79 |
| Very high | M | 67 |
| Very high | M | 62 |
| Very high | M | 62 |
| Very high | M | 66 |
| Very high | M | 85 |
| Very high | F | 90 |

**Supplementary Table S2.** Categorization of the 84 genes included in the Human Autophagy RT<sup>2</sup> Profiler™ PCR Array according to their implication in the processes of autophagy, apoptosis and cell cycle regulation.

| Gene      | Full gene name                                       | Function                     |
|-----------|------------------------------------------------------|------------------------------|
| AMBRA1    | Autophagy/beclin-1 regulator 1                       | autophagic vesicle formation |
| ATG12     | ATG12 autophagy related 12 homolog (S. cerevisiae)   | autophagic vesicle formation |
| ATG16L1   | ATG16 autophagy related 16-like 1 (S. cerevisiae)    | autophagic vesicle formation |
| ATG3      | ATG3 autophagy related 3 homolog (S. cerevisiae)     | autophagic vesicle formation |
| ATG4A     | ATG4 autophagy related 4 homolog A (S. cerevisiae)   | autophagic vesicle formation |
| ATG4B     | ATG4 autophagy related 4 homolog B (S. cerevisiae)   | autophagic vesicle formation |
| ATG4C     | ATG4 autophagy related 4 homolog C (S. cerevisiae)   | autophagic vesicle formation |
| ATG4D     | ATG4 autophagy related 4 homolog D (S. cerevisiae)   | autophagic vesicle formation |
| ATG5      | ATG5 autophagy related 5 homolog (S. cerevisiae)     | autophagic vesicle formation |
| ATG7      | ATG7 autophagy related 7 homolog (S. cerevisiae)     | autophagic vesicle formation |
| ATG9A     | ATG9 autophagy related 9 homolog A (S. cerevisiae)   | autophagic vesicle formation |
| ATG9B     | ATG9 autophagy related 9 homolog B (S. cerevisiae)   | autophagic vesicle formation |
| BECN1     | Beclin 1, autophagy related                          | autophagic vesicle formation |
| GABARAP   | GABA(A) receptor-associated protein                  | autophagic vesicle formation |
| GABARAPL1 | GABA(A) receptor-associated protein like 1           | autophagic vesicle formation |
| GABARAPL2 | GABA(A) receptor-associated protein-like 2           | autophagic vesicle formation |
| IRGM      | Immunity-related GTPase family, M                    | autophagic vesicle formation |
| MAP1LC3A  | Microtubule-associated protein 1 light chain 3 alpha | autophagic vesicle formation |
| MAP1LC3B  | Microtubule-associated protein 1 light chain 3 beta  | autophagic vesicle formation |
| RGS19     | Regulator of G-protein signaling 19                  | autophagic vesicle formation |
| ULK1      | Unc-51-like kinase 1 (C. elegans)                    | autophagic vesicle formation |

|          |                                                              |                                            |
|----------|--------------------------------------------------------------|--------------------------------------------|
| CTSD     | Cathepsin D                                                  | autophagosome-lysosome fusion              |
| CTSS     | Cathepsin S                                                  | autophagosome-lysosome fusion              |
| DRAM1    | DNA-damage regulated autophagy modulator 1                   | autophagosome-lysosome fusion              |
| DRAM2    | DNA-damage regulated autophagy modulator 2                   | autophagosome-lysosome fusion              |
| LAMP1    | Lysosomal-associated membrane protein 1                      | autophagosome-lysosome fusion              |
| NPC1     | Niemann-Pick disease, type C1                                | autophagosome-lysosome fusion              |
| TMEM74   | Transmembrane protein 74                                     | autophagosome-lysosome fusion              |
| HSP90AA1 | Heat shock protein 90kDa alpha (cytosolic), class A member 1 | Chaperone-mediated autophagy               |
| HSPA8    | Heat shock 70kDa protein 8                                   | Chaperone-mediated autophagy               |
| EIF4GI   | Eukaryotic translation initiation factor 4 gamma, 1          | intracellular signals of induced autophagy |
| ESR1     | Estrogen receptor 1                                          | intracellular signals of induced autophagy |
| GAA      | Glucosidase, alpha; acid                                     | intracellular signals of induced autophagy |
| HGS      | Hepatocyte growth factor-regulated tyrosine kinase substrate | intracellular signals of induced autophagy |
| MAPK14   | Mitogen-activated protein kinase 14                          | intracellular signals of induced autophagy |
| PI3KC3   | Phosphoinositide-3-kinase, class 3                           | intracellular signals of induced autophagy |
| PIK3R4   | Phosphoinositide-3-kinase, regulatory subunit 4              | intracellular signals of induced autophagy |
| RPS6KB1  | Ribosomal protein S6 kinase, 70kDa, polypeptide 1            | intracellular signals of induced autophagy |
| ULK2     | Unc-51-like kinase 2 (C. elegans)                            | intracellular signals of induced autophagy |
| UVRAG    | UV radiation resistance associated gene                      | intracellular signals of induced autophagy |
| WIP1     | WD repeat domain, phosphoinositide interacting 1             | protein targeting in autophagy             |
| SQSTM1   | Sequestosome 1                                               | protein targeting in autophagy             |
| ATG10    | ATG10 autophagy related 10 homolog (S. cerevisiae)           | protein transporters                       |
| ATG16L2  | ATG16 autophagy related 16-like 2 (S. cerevisiae)            | protein transporters                       |
| RAB24    | RAB24, member RAS oncogene family                            | protein transporters                       |
| AKT1     | V-akt murine thymoma viral oncogene homolog 1                | apoptosis regulators                       |
| APP      | Amyloid beta (A4) precursor protein                          | apoptosis regulators                       |
| BAD      | BCL2-associated agonist of cell death                        | apoptosis regulators                       |
| BAK1     | BCL2-antagonist/killer 1                                     | apoptosis regulators                       |

|         |                                                                                 |                       |
|---------|---------------------------------------------------------------------------------|-----------------------|
| BAX     | BCL2-associated X protein                                                       | apoptosis regulators  |
| BCL2    | B-cell CLL/lymphoma 2                                                           | apoptosis regulators  |
| BCL2L1  | BCL2-like 1                                                                     | apoptosis regulators  |
| BID     | BH3 interacting domain death agonist                                            | apoptosis regulators  |
| BNIP3   | BCL2/adenovirus E1B 19kDa interacting protein 3                                 | apoptosis regulators  |
| CASP3   | Caspase 3, apoptosis-related cysteine peptidase                                 | apoptosis regulators  |
| CASP8   | Caspase 8, apoptosis-related cysteine peptidase                                 | apoptosis regulators  |
| CLN3    | Ceroid-lipofuscinosis, neuronal 3                                               | apoptosis regulators  |
| CTSB    | Cathepsin B                                                                     | apoptosis regulators  |
| CXCR4   | Chemokine (C-X-C motif) receptor 4                                              | apoptosis regulators  |
| DAPK1   | Death-associated protein kinase 1                                               | apoptosis regulators  |
| EIF2AK3 | Eukaryotic translation initiation factor 2-alpha kinase 3                       | apoptosis regulators  |
| FADD    | Fas (TNFRSF6)-associated via death domain                                       | apoptosis regulators  |
| FAS     | Fas (TNF receptor superfamily, member 6)                                        | apoptosis regulators  |
| HDAC1   | Histone deacetylase 1                                                           | apoptosis regulators  |
| HDAC6   | Histone deacetylase 6                                                           | apoptosis regulators  |
| HTT     | Huntingtin                                                                      | apoptosis regulators  |
| IGF1    | Insulin-like growth factor 1 (somatomedin C)                                    | apoptosis regulators  |
| INS     | Insulin                                                                         | apoptosis regulators  |
| MAPK8   | Mitogen-activated protein kinase 8                                              | apoptosis regulators  |
| MTOR    | Mechanistic target of rapamycin (serine/threonine kinase)                       | apoptosis regulators  |
| NFKB1   | Nuclear factor of kappa light polypeptide gene enhancer in B-cells 1            | apoptosis regulators  |
| PI3KCG  | Phosphoinositide-3-kinase, catalytic, gamma polypeptide                         | apoptosis regulators  |
| PRKAA1  | Protein kinase, AMP-activated, alpha 1 catalytic subunit                        | apoptosis regulators  |
| SNCA    | Synuclein, alpha (non A4 component of amyloid precursor)                        | apoptosis regulators  |
| TGM2    | Transglutaminase 2 (C polypeptide, protein-glutamine-gamma-glutamyltransferase) | apoptosis regulators  |
| TNF     | Tumor necrosis factor                                                           | apoptosis regulators  |
| TNFSF10 | Tumor necrosis factor (ligand) superfamily, member 10                           | apoptosis regulators  |
| TP53    | Tumor protein p53                                                               | apoptosis regulators  |
| CDKN1B  | Cyclin-dependent kinase inhibitor 1B (p27, Kip1)                                | cell cycle regulators |
| CDKN2A  | Cyclin-dependent kinase inhibitor 2A (melanoma, p16, inhibits CDK4)             | cell cycle regulators |
| IFNG    | Interferon, gamma                                                               | cell cycle regulators |
| PTEN    | Phosphatase and tensin homolog                                                  | cell cycle regulators |
| RB1     | Retinoblastoma 1                                                                | cell cycle regulators |
| TGFB1   | Transforming growth factor, beta 1                                              | cell cycle regulators |

**Supplementary Table S3.** Primers sequences (5' – 3') used in the qPCR experiments.

| Gene   | Direction | Sequence                      |
|--------|-----------|-------------------------------|
| ATG5   | Forward   | CCCATCAATCGGAAACTCATG         |
|        | Reverse   | CCCCATCTTCAGGATCAATAGC        |
| ATG12  | Forward   | TTTGCTAAAGGCTGTGGG            |
|        | Reverse   | AAGGAGCAAAGGACTGAT            |
| ATG16  | Forward   | TGCAGTTCAGTCCAGGTTC           |
|        | Reverse   | GCTAAGAGGTAAGATCCAGCAC        |
| DRAM1  | Forward   | TGGGATGTTTCGGAATGGG           |
|        | Reverse   | AAGAAACGGCAGAGATGACC          |
| DRAM2  | Forward   | ATGTAAGTGGAGCTGTGCTTACCTTTGGT |
|        | Reverse   | ACTGTGCAAACTGATGAGCAAGTCAG    |
| AMBRA1 | Forward   | AACCCTCCACTGCGAGTTGA          |
|        | Reverse   | TCTACCTGTTCCGTGGTTCTCC        |
| UVRAG  | Forward   | AAACTGACGGAAAAGGAGAG          |
|        | Reverse   | CCATGTTGATATCTTAGCTGTGC       |
| PI3K   | Forward   | GGGATTAGTGCTGAGGTCATG         |
|        | Reverse   | AGTCTATGTGGAAGAGTTTGCC        |
| TGM2   | Forward   | CCAACTACAACTCGGCCCAT          |
|        | Reverse   | CTGGTCATCCACGACTCCAC          |
| LC3B   | Forward   | GAGAAGCAGCTTCCTGTTCTGG        |
|        | Reverse   | GTGTCCGTTACCAACAGGAAG         |
| BCL2   | Forward   | CGGAGGCTGGGATGCCTTTG          |
|        | Reverse   | TTTGGGGCAGGCATGTTGAC          |
| CASP3  | Forward   | TGGTTTGAGCCTGAGCAGAGA         |
|        | Reverse   | TCATCCACACATAACCAGTGCG        |
| CASP7  | Forward   | TCTTCGGCCTATTCCACGGTTC        |
|        | Reverse   | TTCCAGGTCTTTTCCGTGCTC         |
| CASP8  | Forward   | AAGGAGCTGCTCTTCCGAATT         |
|        | Reverse   | AATTTGAGCCCTGCCTGGT           |
| CTSB   | Forward   | TGTAATGGTGGCTATCCTGCT         |
|        | Reverse   | AGGCTCACAGATCTTGCTACA         |
| HPRT1  | Forward   | TGACACTGGCAAAACAATGCA         |
|        | Reverse   | GGTCCTTTTCACCAGCAAGCT         |

**Supplementary Table S4.** Standard deviation values for samples from each analyzed group per individual gene.

| Standard Deviation of average $\Delta C_t$ |          |                   |                    |
|--------------------------------------------|----------|-------------------|--------------------|
|                                            | Controls | Lower-risk<br>MDS | Higher-risk<br>MDS |
| ATG12                                      | 0.12     | 0.06              | 0.23               |
| DRAM1                                      | 0.18     | 0.12              | 0.06               |
| DRAM2                                      | 0.21     | 0.08              | 0.23               |
| ATG16                                      | 0.09     | 0.23              | 0.18               |
| PI3KC3                                     | 0.06     | 0.21              | 0.08               |
| ATG5                                       | 0.04     | 0.15              | 0.23               |
| AMBRA1                                     | 0.23     | 0.12              | 0.21               |
| UVRAG                                      | 0.15     | 0.04              | 0.18               |
| TGM2                                       | 0.17     | 0.23              | 0.23               |
| LC3B                                       | 0.11     | 0.24              | 0.09               |
| CASP7                                      | 0.12     | 0.13              | 0.25               |
| CASP8                                      | 0.19     | 0.09              | 0.12               |
| CASP3                                      | 0.13     | 0.06              | 0.14               |
| CTSB                                       | 0.12     | 0.12              | 0.21               |
| BCL2                                       | 0.08     | 0.02              | 0.22               |

**Supplementary Table S5.** Expression profiling of genes related directly or indirectly to autophagy in different groups of patients with MDS versus healthy controls by using a PCR array.

|         | Fold change |                |                 |
|---------|-------------|----------------|-----------------|
| Gene    | All MDS     | Lower-risk MDS | Higher-risk MDS |
| AMBRA1  |             | -2.8           |                 |
| AKT1    | -6.73       |                | -20.66          |
| APP     |             |                | -13.83          |
| ATG10   |             | -3.17          |                 |
| ATG12   | -4.95       |                | -10.97          |
| ATG16L1 | -4.56       | -3.52          |                 |
| ATG16L2 | -10.74      |                | -27.42          |
| ATG3    | -5.81       |                | -18.58          |
| ATG4C   |             | -2.65          |                 |
| ATG4D   | -3.83       | -2.66          |                 |
| ATG5    | -3.5        |                | -6.53           |
| ATG7    |             |                | -7.76           |
| ATG9A   |             | -3.38          |                 |
| ATG9B   |             | -5.71          |                 |
| BAD     | -3.57       | -2.58          |                 |
| BAX     | -6.49       | -2.51          | -16.76          |



|         |        |       |         |
|---------|--------|-------|---------|
| BCL2    |        | -4.29 |         |
| BCL2L1  |        | -3.14 |         |
| BECN1   | -7.96  | -4.1  | -15.46  |
| BID     | -10.87 | -2.95 | -40     |
| BNIP3   | -5.88  | -3.15 | -10.97  |
| CASP3   | -6.07  | -2.33 | -15.85  |
| CASP8   | -16.09 | -6.07 | -42.68  |
| CDKN1B  | -9.17  | -3.65 | -23.02  |
| CDKN2A  |        | -3.26 |         |
| CLN3    |        | -2.98 |         |
| CTSB    | -6.63  | -2.92 | -15.05  |
| CTSD    |        |       | -32.37  |
| CTSS    | -36.3  | -5.92 | -222.55 |
| CXCR4   |        |       | -61.59  |
| DAPK1   |        | -6.36 |         |
| DRAM2   | -5.27  | -2.5  | -11.12  |
| EIF2AK3 |        | -2.48 |         |
| EIF4G1  |        |       | -13.92  |
| ESR1    |        | -4.64 |         |

|           |        |       |        |
|-----------|--------|-------|--------|
| FADD      | -5.55  | -3.53 | -8.74  |
| FAS       | -10.99 | -3.79 | -31.84 |
| GAA       | -8.34  | -5.08 | -13.69 |
| GABARAP   | -14.22 | -3.2  | -63.24 |
| GABARAPL1 | -11.4  | -5.02 | -25.91 |
| GABARAPL2 | -14.21 | -3.68 | -54.85 |
| HDAC1     | -7.14  | -2.5  | -20.38 |
| HGS       |        | -6.29 |        |
| HSPA8     | -11.48 | -3.2  | -41.24 |
| IGF1      |        | -2.86 |        |
| INS       |        | -4.73 |        |
| IRGM      |        | -6.34 |        |
| LAMP1     | -6.66  | -3.97 |        |
| MAP1LC3A  | -5.59  | -4.43 | -7.05  |
| MAP1LC3B  |        |       | -10.78 |
| MAPK8     | -3.53  | -2.51 |        |
| MAPK14    |        |       | -22.42 |
| NFKB1     | -4.82  | -2.8  | -8.32  |
| NPC1      | -4.93  | -3.4  | -7.13  |

|         |        |       |        |
|---------|--------|-------|--------|
| PIK3C3  | -4.18  |       | -6.71  |
| PIK3CG  |        |       | -10.35 |
| PRKAA1  |        |       | -5.82  |
| PTEN    | -15.86 | -4.13 | -60.88 |
| RB1     | -4.45  |       | -10.76 |
| RGS19   | -12.19 | -4.87 | -30.51 |
| SQSTM1  | -12.59 | -3.47 | -45.68 |
| TGFB1   | -19.55 | -5.11 |        |
| TMEM74  |        | -6.34 |        |
| TNF     |        | -4.78 |        |
| TNFSF10 | -17.97 | -5.36 | -60.19 |
| TP53    | -5.34  |       | -15.07 |
| ULK1    |        | -4.63 |        |
| UVRAG   |        | -2.22 |        |

The table presents all genes with  $\geq 2$  (mean value) fold change (up- or downregulated) and statistical significance of  $p < 0.05$  as identified by the PCR array data analysis in different (sub)groups of MDS samples compared to controls. The *HPRT1* gene was used as internal standard. Genes are sorted in alphabetical order.

**Supplementary Table S6.** Standard Deviation of DCt (Ct gene of interest- Ct housekeeping gene) in PB samples versus paired BM samples from the same patients with MDS.

|           | ATG12 | DRAM1 | DRAM2 | ATG16 | PI3K | ATG5 | AMBRA | UVRAG | TGM2 | BCL2 | CASP7 | LC3B |
|-----------|-------|-------|-------|-------|------|------|-------|-------|------|------|-------|------|
| Patient 1 | 0.58  | 0.61  | 0.16  | 0.62  | 0.5  | 0.32 | 0.62  | 0.18  | 0.10 | 0.72 | 1.11  | 0.30 |
| Patient 2 | 0.35  | 0.12  | 0.45  | 0.52  | 0.15 | 0.23 | 0.16  | 0.69  | 0.13 | 0.13 | 0.13  | 0.13 |
| Patient 3 | 0.45  | 0.12  | 0.27  | 0.63  | 0.14 | 0.42 | 0.21  | 0.34  | 0.69 | 0.47 | 0.23  | 0.67 |
